# Supplementary material for: Phosphate Groups in the Lipid A Moiety Determine the Effects of LPS on Hepatic Stellate Cells: A Role for LPS-Dephosphorylating Activity in Liver Fibrosis
Source: MDPI journal article supplement (doi:10.3390/cells9122708), 2020-12-17
Supplement: s1 [file s1]

## Supplementary Table

Table 1: Patient characteristics of the human livers used.

|                     | Normal livers                      | Cirrhotic livers                   |
|---------------------|------------------------------------|------------------------------------|
|                     | N=7                                | N=6                                |
| Age (min-max) years | 41 (10-57)                         | 49 (35-66)                         |
| Gender              | n=4: F<br>n=2: M<br>n=1: not known | n=3: F<br>n=1: M<br>n=2: not known |
